# Supplementary material for: Education, Employment, and Financial Outcomes in Adolescent and Young Adult Cancer Survivors—A Systematic Review
Source: MDPI journal article supplement (doi:10.3390/curroncol30100631), 2023-09-25
Supplement: s1 [file s1]

## Supplementary Material

### Education, Employment, and Financial Outcomes in Adolescent and Young Adult Cancer Survivors – A Systematic Review

Aurelia Altherr <sup>1</sup>, Céline Bolliger <sup>1</sup>, Michaela Kaufmann <sup>1</sup>, Daniela Dyntar <sup>1,2</sup>, Katrin Scheinemann <sup>1,3,4</sup>, Gisela Michel <sup>1</sup>, Luzius Mader <sup>5,6</sup> and Katharina Roser <sup>1,\*</sup>

- 1 Faculty of Health Sciences and Medicine, University of Lucerne, Alpenquai 4, 6005 Lucerne, Switzerland
  - 2 Cancer Registry of Central Switzerland, 6000 Lucerne, Switzerland
  - 3 Division of hematology & oncology, Children's Hospital of Eastern Switzerland, 9006 St. Gallen, Switzerland
  - 4 Department of Pediatrics, McMaster Children's Hospital and McMaster University, Hamilton, L8N 3Z5 ON, Canada
  - 5 Institute of Social and Preventive Medicine, University of Bern, 3012 Bern, Switzerland
  - 6 Cancer Registry Bern-Solothurn, University of Bern, 3008 Bern, Switzerland
- \* corresponding author

#### Corresponding author:

Katharina Roser, Faculty of Health Sciences and Medicine, University of Lucerne, Alpenquai 4, 6005 Lucerne, Switzerland; [katharina.rosen@unilu.ch](mailto:katharina.rosen@unilu.ch)

#### Content

|                                                                                           |    |
|-------------------------------------------------------------------------------------------|----|
| <b>Table S1:</b> Characteristics of included quantitative studies (detailed version)..... | 2  |
| <b>Table S2:</b> Characteristics of included qualitative studies (detailed version). .... | 13 |
| <b>Table S3:</b> PICO formats for the research questions. ....                            | 16 |
| <b>Table S4:</b> Search blocks for the search in the literature databases. ....           | 17 |
| <b>Table S5:</b> Quality assessment for quantitative cross-sectional studies. ....        | 18 |
| <b>Table S6:</b> Quality assessment for qualitative studies. ....                         | 19 |

**Table S1:** Characteristics of included quantitative studies (detailed version).

| First author, publication year | Country | Study design               | Data source                                       | Data collection method                 | Sample size | Response rate                                        | Gender: percentage male                                                                                                 | Age at time of study                                                                                                                                                                                                                                                                                                                        | Age at diagnosis   | Time since diagnosis                                                                                                                                                                                                                                            | Education, employment, and/or financial outcomes<br>(not main outcomes, additionally reported)                                                                                                                                                                                                                                                                                                                                                                                              | Cancer types                                                                                                                                                                                                                                                                                                                                                                                                                                                                                                                                 | Comparisons |
|--------------------------------|---------|----------------------------|---------------------------------------------------|----------------------------------------|-------------|------------------------------------------------------|-------------------------------------------------------------------------------------------------------------------------|---------------------------------------------------------------------------------------------------------------------------------------------------------------------------------------------------------------------------------------------------------------------------------------------------------------------------------------------|--------------------|-----------------------------------------------------------------------------------------------------------------------------------------------------------------------------------------------------------------------------------------------------------------|---------------------------------------------------------------------------------------------------------------------------------------------------------------------------------------------------------------------------------------------------------------------------------------------------------------------------------------------------------------------------------------------------------------------------------------------------------------------------------------------|----------------------------------------------------------------------------------------------------------------------------------------------------------------------------------------------------------------------------------------------------------------------------------------------------------------------------------------------------------------------------------------------------------------------------------------------------------------------------------------------------------------------------------------------|-------------|
| Abdelhadi 2021 et al. [23]     | USA     | Retrospective cohort study | 2011-2016 Medical Expenditure Panel Survey (MEPS) | in-person interviews and questionnaire | n = 2326    | MEPS (2011-2016): 53.5-59.3% for the different years | AYA cancer survivors with chronic conditions: 23.90% male, AYA cancer survivors without chronic conditions: 21.85% male | (weighted proportions)<br>AYA cancer survivors with chronic conditions:<br>18-29 years: 6.14%, 30-39 years: 15.52%, 40-49 years: 24.36%, 50-64 years: 36.10%, ≥65 years: 17.88%<br>AYA cancer survivors without chronic conditions:<br>18-29 years: 18.14%, 30-39 years: 37.52%, 40-49 years: 27.82%, 50-64 years: 13.90%, ≥65 years: 2.70% | range: 15-39 years | AYA cancer survivors with chronic conditions:<br>0-4 years: 10.86%, 5-9 years: 12.73%, 10-19 years: 26.31%, ≥20 years: 50.09%, AYA cancer survivors without chronic conditions:<br>0-4 years: 31.85%, 5-9 years: 22.96%, 10-19 years: 29.43%, ≥20 years: 15.76% | (weighted proportions)<br><b>Education (s):</b><br>AYA cancer survivors with chronic conditions:<br>less than high school: 38.10%, high school graduate: 35.00%, college or more: 26.90%, AYA cancer survivors without chronic conditions:<br>less than high school: 35.03%, high school graduate: 26.71%, some college or more: 38.26%<br><b>Income (s):</b><br>AYA cancer survivors with chronic conditions:<br>poor: 15.97%, near poor: 6.30%, low: 14.41%, middle: 25.52%, high: 37.80% | (weighted proportions)<br>AYA cancer survivors with chronic conditions:<br>bladder: 0.70%, brain: 1.69%, breast: 12.57%, cervix: 32.90%, colon: 2.94%, leukaemia: 1.72%, lung: 2.07%, lymphoma: 4.42%, melanoma: 9.26%, other: 28.26%, prostate: 1.70%, throat: n/a, thyroid: 3.90%<br>AYA cancer survivors without chronic conditions:<br>bladder: n/a, brain: n/a, breast: 11.15%, cervix: 21.86%, colon: 1.76%, leukaemia: 1.52%, lung: n/a, lymphoma: 5.45%, melanoma: 10.94%, other: 26.55%, prostate: n/a, throat: n/a, thyroid: 8.50% | none        |

|                            |        |                            |                                                                        |                                          |                                          |                                                      |            |                                                                                                  |                                                                                                                                 |                                      |                                                                                                                                                                                                                                 |                                                                            |                                          |
|----------------------------|--------|----------------------------|------------------------------------------------------------------------|------------------------------------------|------------------------------------------|------------------------------------------------------|------------|--------------------------------------------------------------------------------------------------|---------------------------------------------------------------------------------------------------------------------------------|--------------------------------------|---------------------------------------------------------------------------------------------------------------------------------------------------------------------------------------------------------------------------------|----------------------------------------------------------------------------|------------------------------------------|
|                            |        |                            |                                                                        |                                          |                                          |                                                      |            |                                                                                                  |                                                                                                                                 |                                      | AYA cancer survivors without chronic conditions: poor: 13.22%, near poor: 3.27%, low: 10.52%, middle: 32.95%, high: 40.04%                                                                                                      |                                                                            |                                          |
| Abdelhadi 2022 et al. [29] | USA    | Retrospective cohort study | 2011-2016 Medical Expenditure Panel Survey (MEPS)                      | in-person interviews and questionnaire   | n = 2081 (n = 1757 for matched analyses) | MEPS (2011-2016): 53.5-59.3% for the different years | 20.0% male | 18-29 years: 10.2%, 30-39 years: 22.9%, 40-49 years: 27.3%, 50-64 years: 26.6%, ≥65 years: 13.0% | range: 15-39 years                                                                                                              | not reported                         | <b>Education (s):</b> less than high school: 27.1%, high school graduate: 18.9%, some college or more: 13.5%                                                                                                                    | not reported                                                               | adults without cancer history (n = 5227) |
| Bhatt 2021 et al. [30]     | USA    | Retrospective cohort study | Center for International Blood and Marrow Transplant Research (CIBMTR) | standard data collection forms of CIBMTR | n = 1365                                 | not applicable                                       | 56% male   | not reported                                                                                     | mean age at treatment = 30.8 years, range = 18-39 years, 18-24 years: 19%, 25-29 years: 26%, 30-34 years: 27%, 35-39 years: 28% | not reported                         | <b>Highest education (d):</b> high school or less: 36%, college: 15%, graduate school: 26%, missing: 22%<br><b>Employment status (d):</b> full-time: 43%, part-time: 4%, unemployed: 19%, medical disability: 16%, unknown: 17% | leukaemia: 68%, lymphoma: 11%, other diseases apart from cancer: 21%       | none                                     |
| Dahl 2019 et al. [31]      | Norway | Cross-sectional study      | Cancer Registry of Norway                                              | self-reported information                | n = 1189                                 | 42%                                                  | 27% male   | mean (SD) = 49.7 (7.8), median = 49 years, range: 27-65 years                                    | mean (SD) = 33.0 (5.3), median = 35 years, range: 19-39 years,                                                                  | median = 16 years, range: 6-31 years | <b>Educational attainment (s):</b> high (>12 years): 59%, low (<12 years): 41%<br><b>Employment status (s):</b> employed: 75%, non-employed: 25%                                                                                | breast: 41%, colorectal: 12%, lymphoma: 19%, leukaemia: 11%, melanoma: 17% | none                                     |

|                                  |         |                       |                                             |                                                                   |         |              |            |                              |                                                  |                                                                           |                                                                                                                                                                                                                                                                                                                                                                                                                      |                                                                                                                                                                                                                                                                              |                                                                                                                                                                               |
|----------------------------------|---------|-----------------------|---------------------------------------------|-------------------------------------------------------------------|---------|--------------|------------|------------------------------|--------------------------------------------------|---------------------------------------------------------------------------|----------------------------------------------------------------------------------------------------------------------------------------------------------------------------------------------------------------------------------------------------------------------------------------------------------------------------------------------------------------------------------------------------------------------|------------------------------------------------------------------------------------------------------------------------------------------------------------------------------------------------------------------------------------------------------------------------------|-------------------------------------------------------------------------------------------------------------------------------------------------------------------------------|
| Dieluweit<br>2011 et al.<br>[20] | Germany | Cross-sectional study | German Childhood Cancer Registry            | self-reported information                                         | n = 820 | 43.70%       | 49% male   | mean (SD)=29.9 (6) years     | mean (SD)=15.8 (0.9) years, range: 15-18 years,  | mean (SD)=13.7 (6) years                                                  | <b>University entrance qualification (s):</b><br>52.4% of survivors, 38.3% of comparisons<br><b>Employed (s):</b><br>79.6% in survivors, 74.2% in comparisons                                                                                                                                                                                                                                                        | lymphoma: 30.5%, malignant bone tumour: 21.2%, leukaemia: 19.3%, CNS tumours: 9.5%, soft tissue and other extraosseous sarcomas: 9.2%, germ cell tumours: 6.6%, other malignant epithelial neoplasms and malignant melanomas: 2.4%, renal tumours: 0.9%, neuroblastoma: 0.5% | age-matched sample from the general population (German Socio-Economic Panel, n = 820)                                                                                         |
| Ekwueme<br>2016 et al.<br>[32]   | USA     | Cross-sectional study | CDC's National Center for Health Statistics | National Health Interview Survey (NHIS), a cross-sectional survey | n = 244 | not reported | all female | mean (SD)=39.42 (5.29) years | mean (SD)=34.42(6.95) years, range: 18-44 years, | <2 years: 30.74%, 2-4 years: 28.69%, 5-10 years: 29.1%, ≥11 years: 11.48% | women aged 18-44 with breast cancer vs women aged 18-44 without breast cancer vs women aged 44-64 with breast cancer:<br><b>Employment (s):</b><br>employed: 75.43% vs 78.38% vs 64.61%<br><b>Income (s):</b><br>low (<34,999\$): 30.59% vs 33.54% vs 25.88%, medium (35,000\$-74,999\$): 29.08% vs 29.69% vs 25.93%, high (>75,000\$): 28.59% vs 24.11% vs 16.4%, bachelor/master degree: 29.46% vs 26.67% vs 32.33 | all breast                                                                                                                                                                                                                                                                   | women aged 18-44 years without breast cancer (n = 82694), women aged 45-64 at diagnosis with breast cancer (n =1508), women aged 45-64 years without breast cancer (n =52586) |

|                          |          |                            |                                                                         |                     |          |                             |                                                 |                                                                                            |                                                                                                                                                            |                                                        |                                                                                                                                                                                                                                                                                     |                                                                                                                                                                                                                                                                                                            |                                                                             |
|--------------------------|----------|----------------------------|-------------------------------------------------------------------------|---------------------|----------|-----------------------------|-------------------------------------------------|--------------------------------------------------------------------------------------------|------------------------------------------------------------------------------------------------------------------------------------------------------------|--------------------------------------------------------|-------------------------------------------------------------------------------------------------------------------------------------------------------------------------------------------------------------------------------------------------------------------------------------|------------------------------------------------------------------------------------------------------------------------------------------------------------------------------------------------------------------------------------------------------------------------------------------------------------|-----------------------------------------------------------------------------|
| Ghaderi 2013 et al. [33] | Norway   | Retrospective cohort study | Cancer Registry of Norway                                               | not reported        | n = 2561 | not reported                | 55.4% male (childhood and AYA cancer survivors) | not reported                                                                               | 15-19 years: 1019, 20-24 years: 1542, mean follow-up time of study of 5-year survivors=13.2 years range: 0-39.3 years (childhood and AYA cancer survivors) | not reported                                           | not reported                                                                                                                                                                                                                                                                        | brain/CNS tumours: 18.2%, testis: 15.4%, lymphatic system: 14.4%, hematopoietic system: 12.9%, melanoma: 10.6%, other: 7.4%, thyroid gland and other endocrine glands: 7.3%, bone and connective tissue: 5.6%, kidney: 2.7%, eye: 2.2%, ovary: 2%, cervix uteri: 1.2% (childhood and AYA cancer survivors) | childhood cancer survivors (0-14 years of age at diagnosis; n = 1470)       |
| Guy 2014 et al. [34]     | USA      | Retrospective cohort study | Medical Expenditure Panel Surveys (MEPS) 2008-2011                      | not reported        | n = 1464 | MEPS (2008-2011: 53.5-59.3% | 22.2% male                                      | 18-29 years: 11%, 30-39 years: 21%, 40-49 years: 26.7%, 50-64 years: 29.3%, ≥65 years: 12% | range: 15-39 years                                                                                                                                         | 0-9 years: 30.5%, 10-19 years: 27.7%, ≥20 years: 41.9% | survivors vs comparisons: <b>Educational attainment (s):</b> less than high school graduate: 15.5% vs 16.9%), high school graduate: 29.9% vs 29.5%, some college or more: 54.7% vs 53.2%, <b>Family income (s):</b> low: 21.4% vs 16.7%, middle: 41.6% vs 44%, high: 37.0% vs 39.3% | not reported                                                                                                                                                                                                                                                                                               | adults without cancer in the pooled sample of 2008-11 MEPS data (n = 86865) |
| Hamzah 2021 et al. [35]  | Malaysia | Cross-sectional study      | National Cancer Institute of Malaysia and Kuala Lumpur General Hospital | hospital interviews | n = 400  | not reported                | 43.3% male                                      | mean (SD)=29.1 (7.16) years, range: 18-40, 18-20 years: 12.5%, 21-25                       | not reported                                                                                                                                               | >5 years                                               | <b>Educational attainment (s):</b> PhD: 0.5%, master degree: 5.3%, bachelor degree: 31.8%, diploma: 31.5%,                                                                                                                                                                          | leukaemia: 32.25%, Hodgkin lymphoma: 10.0%, ovarian: 8.0%, ependymoma: 7.25%, breast: 6.25%,                                                                                                                                                                                                               | none                                                                        |

|                           |     |                            |                                                          |               |         |        |            |                                                                      |                                                                            |                                                                           |                                                                                                                                                                                                                                               |                                                                                                                                                                                                                                                                                                             |                                                                                                                                                                                                                                                                     |      |
|---------------------------|-----|----------------------------|----------------------------------------------------------|---------------|---------|--------|------------|----------------------------------------------------------------------|----------------------------------------------------------------------------|---------------------------------------------------------------------------|-----------------------------------------------------------------------------------------------------------------------------------------------------------------------------------------------------------------------------------------------|-------------------------------------------------------------------------------------------------------------------------------------------------------------------------------------------------------------------------------------------------------------------------------------------------------------|---------------------------------------------------------------------------------------------------------------------------------------------------------------------------------------------------------------------------------------------------------------------|------|
|                           |     |                            |                                                          |               |         |        |            | years: 27%, 26-30 years: 17.8%, 31-35 years: 12.8%, 36-40 years: 30% |                                                                            |                                                                           | higher school certificate: 4.8%, certificate of education: 23.5%, certificate of lower education: 2.9%                                                                                                                                        | Wilms' tumour: 5.75%, Ewing's sarcoma: 5.75%, testicular: 3.5%, medulloblastoma: 3.5%, brain tumour: 3.25%, yolk sac tumour: 3%, liver cancer: 2.75%, papillary thyroid: 1.5%, nasopharyngeal cancer: 1.5%, neuroblastoma: 1.5%, intestinal: 1.25%, lung: 1%, germinoma: 1%, embryonal rhabdomyosarcoma: 1% |                                                                                                                                                                                                                                                                     |      |
| Ketterl 2019 et al. [24]  | USA | Cross-sectional study      | collected data                                           | online survey | n = 872 | 67%    | 27.2% male | not reported                                                         | females: mean (SD)=32.3 (5.62) years, males: mean (SD)= 29.8 (6.09) years, | females: mean (SD) =3.53 (1.49) years, males: mean (SD)=3.40 (1.29) years | <b>Employment (s):</b> permanent employment: 67.5%, temporary employment: 12.5%, self-employed: 14.8%, part-time employed: 5.2%<br><b>Monthly income (s):</b> <RM3,00: 49.5%, RM3,001-RM5,000: 34.0%, RM5,001-RM10,00: 13.3%, >RM10,001: 0.5% | <b>Educational attainment (s):</b> high school or less: 6.9%, some college: 22%, college graduate: 38%, post graduate: 33.1%                                                                                                                                                                                | breast: 27.6%, leukaemia and lymphoma: 18.7%, endocrine system: 14.7%, skin: 9.3%, genital system: 10.9%, brain and other CNS tumours: 4.7%, bones and soft tissue: 4.1%, digestive system: 4.0%, oral cavity and pharynx: 2.9%, urinary system: 1.6%, others: 1.5% | none |
| Landwehr 2016 et al. [36] | USA | Retrospective cohort study | information on grant applications submitted between 2007 | not reported  | n = 334 | 33.60% | 20.4% male | age at time of application submission: mean =29.3 years, median      | mean (SD)=24.5 (6.7) years, median = 26 years, 95% CI: [23.7-25.2],        | time of treatment completion prior application submission:                | not reported                                                                                                                                                                                                                                  | not reported                                                                                                                                                                                                                                                                                                | US census data from 2011 and 2013, using the groups                                                                                                                                                                                                                 |      |

|                        |             |                            |                                                                                                                       |                           |          |                                                    |            |                                                                                                                    |                                                                          |                                                                                                                           |                                                                                                                                                                                                                                                                            |                                                                                                                                                                     |                                                                                                                     |
|------------------------|-------------|----------------------------|-----------------------------------------------------------------------------------------------------------------------|---------------------------|----------|----------------------------------------------------|------------|--------------------------------------------------------------------------------------------------------------------|--------------------------------------------------------------------------|---------------------------------------------------------------------------------------------------------------------------|----------------------------------------------------------------------------------------------------------------------------------------------------------------------------------------------------------------------------------------------------------------------------|---------------------------------------------------------------------------------------------------------------------------------------------------------------------|---------------------------------------------------------------------------------------------------------------------|
|                        |             |                            | and 2013 to Samfund, which is a national non-profit organization that helps AYACS reduce debt and live independently. |                           |          |                                                    |            | = 30.0 years, 95% CI: 28.7-29.8, SD=4.4 years, range: 19-39 years                                                  |                                                                          | mean (SD)=3.5 (4.6) years, median = 1.8 years, 95% CI: 3.0-4.0                                                            |                                                                                                                                                                                                                                                                            |                                                                                                                                                                     | "under age 35" and "25-34 years of age", n = 16513000, and MEPS, using the group "18-44 years of age", n = 21877000 |
| Lim 2020 et al. [37]   | Switzerland | Retrospective cohort study | institutional database from Paul Scherrer Institute (PSI)                                                             | not reported              | n = 176  | not applicable                                     | 43.2% male | not reported                                                                                                       | median (SD) age at treatment =30.3 (±7.6) years, range: 15.1-39.5 years, | median time since treatment=66 months, range: 12-236 months                                                               | for 63 participants with longitudinal data available: <b>Employment (t):</b> unemployed: 9.5%, employed (100% sick leave): 14.3%, employed (at work): 42.9%, in education: 33.3% <b>Employment (fu):</b> unemployed: 23.8%, employed (at work): 63.5%, in education: 12.7% | all brain and skull base tumours                                                                                                                                    | none                                                                                                                |
| Lu 2021 et al. [38]    | USA         | Cross-sectional study      | 2010-2018 National Health Interview Surveys (NHIS)                                                                    | in-person interviews      | n = 2588 | NHIS (2010-2018)64.2-82.0% for the different years | 32.8% male | 18-29 years: 8.3%, 30-39 years: 23.0%, 40-49 years: 26.1%, 50-64 years: 27.4%, 65-80 years: 12.2%, 81+ years: 2.9% | Median (IQR)=31 (26-35) years                                            | (categories are not mutually exclusive), <2 years: 8.4%, ≥2 years: 91.6%, >6 years: 75%, >16 years: 50%, >31 years: 25.0% | <b>Education (s):</b> <high school or missing: 10.5%, high school: 22.5%, ≥some college: 67% <b>Family income (s)</b> (as % of federal poverty level): <200: 26.6%, ≥200 and <400: 25.7%, ≥400: 40.6%, missing: 7.1%                                                       | lymphoma: 7.8% , melanoma: 12.3%, testicular cancer: 5.5%, thyroid cancer: 9.1%, ovarian cancer: 7.3%, uterine cancer: 10.8%, leukaemia: 1.9%, breast cancer: 15.7% | adults without cancer history (n = 256964)                                                                          |
| Mader 2017 et al. [19] | Switzerland | Cross-sectional study      | Cancer Registry Zurich and Zug and                                                                                    | self-reported information | n = 160  | 41.10%                                             | 61.3% male | mean (SD)=33.5(5.9) years, 20-29                                                                                   | mean (SD)=21.1 (2.9) years, range: 16-25                                 | mean (SD)=11.9 (4.7) years                                                                                                | survivors vs comparisons:                                                                                                                                                                                                                                                  | lymphoma: 37.5%, germ cell tumour: 28.8%, CNS tumour:                                                                                                               | Swiss Health Survey                                                                                                 |

|                                |        |                                                                                                          |                                                                                                                                                                                                                           |                              |          |              |            |                                                           |                                                            |                                                                       |                                                                                                                                                                                                                                                                                               |                                                                                                                                             |                                                                                                          |
|--------------------------------|--------|----------------------------------------------------------------------------------------------------------|---------------------------------------------------------------------------------------------------------------------------------------------------------------------------------------------------------------------------|------------------------------|----------|--------------|------------|-----------------------------------------------------------|------------------------------------------------------------|-----------------------------------------------------------------------|-----------------------------------------------------------------------------------------------------------------------------------------------------------------------------------------------------------------------------------------------------------------------------------------------|---------------------------------------------------------------------------------------------------------------------------------------------|----------------------------------------------------------------------------------------------------------|
|                                |        |                                                                                                          |                                                                                                                                                                                                                           |                              |          |              |            | years: 26.9%,<br>30-29 years:<br>53.1%, ≥40<br>years: 20% | years, 16-20<br>years: 43.8%, 21-<br>25 years: 56.3%,      |                                                                       | <b>Educational<br/>achievement (s):</b><br>basic: 8.2% vs<br>4.8%, vocational<br>training: 46.5% vs<br>47.2%, upper sec-<br>ondary: 33.3% vs<br>26.7%, university:<br>11.9% vs 21.3%<br><b>Employment sta-<br/>tus (s):</b><br>employed: 91.2%<br>vs 89.5%, unem-<br>ployed: 8.8% vs<br>10.5% | 9.4%, soft tissue sar-<br>coma: 9.4%, leukae-<br>mia: 8.1%, bone tu-<br>mour: 3.8%, renal<br>tumour: 1.9%, neu-<br>roblastoma: 1.3%         | (SHS), par-<br>ticipants<br>aged 20–50<br>years resi-<br>dent in the<br>Canton of<br>Zurich (n =<br>999) |
| Meernik<br>2020 et al.<br>[25] | USA    | Cross-sec-<br>tional study<br>(restricted to<br>working<br>(full/part-<br>time) at time<br>of diagnosis) | information<br>from the<br>North Caro-<br>lina Central<br>Cancer Regis-<br>try and the<br>Kaiser Perma-<br>nente North-<br>ern California<br>(KPNC) and<br>Southern Cal-<br>ifornia<br>(KPSC) tu-<br>mour regis-<br>tries | online survey                | n = 1328 | 12.80%       | all female | median<br>(SD)=41.0 (6.2)<br>years                        | median<br>(SD)=34.0 (5.1)<br>years, range: 16-<br>39 years | median<br>(SD)=7.0 (3.6)<br>years, range:<br>3-15 years               | <b>Employment sta-<br/>tus (d):</b><br>part-time: 17%,<br>full-time: 82.6%,<br>employed but un-<br>know status: 0.4%<br><b>Educational at-<br/>tainment (s):</b><br>high school or less:<br>4.7%, some college:<br>29.4%, bachelor de-<br>gree or more:<br>65.9%                              | breast: 41.7%, thy-<br>roid: 22.3%, mela-<br>noma: 14.4%, lym-<br>phoma: 10.4%, gy-<br>naecologic (cervical,<br>uterine, ovarian):<br>11.2% | none                                                                                                     |
| Nord 2015 et<br>al. [39]       | Sweden | Retrospective<br>cohort study                                                                            | SWE-<br>NOTECA<br>(Swedish<br>Norwegian<br>Testicular<br>Cancer<br>Group) data-<br>base                                                                                                                                   | not reported                 | n = 2146 | not reported | all male   | not reported                                              | median =32<br>years, range: 18-<br>60 years                | follow-up for<br>study: median<br>= 10 years,<br>range: 2-19<br>years | <b>Education (s):</b><br>≤9 years: 15%, 10-<br>12 years: 54%, >12<br>years: 30%                                                                                                                                                                                                               | all testicular                                                                                                                              | general pop-<br>ulation with-<br>out a cancer<br>history (n =<br>8448)                                   |
| Nugent 2018<br>et al. [40]     | USA    | Cross-sec-<br>tional study                                                                               | collected data                                                                                                                                                                                                            | self-reported<br>information | n = 23   | not reported | 69.9% male | mean<br>(SD)=23.8 (4.0)<br>years, median                  | mean = 17.4<br>years, range: 15-<br>21 years, length       | ≥2 years since<br>active cancer<br>treatment                          | <b>Duration of educa-<br/>tion (s):</b>                                                                                                                                                                                                                                                       | Hodgkin lym-<br>phoma: 43.4%, acute                                                                                                         | controls<br>were<br>matched to                                                                           |



|                              |              |                                                                                                                                                  |                                                                                                                                                          |                       |                                                 |                                                              |                                                                                                                   |                                                             |                                                                                                                                                                                                                           |                                                                                                                                                                                                                                    |                                                                                                                                                                                                         |                                                                                                                                                                                                                               |                                                                                                                                                   |
|------------------------------|--------------|--------------------------------------------------------------------------------------------------------------------------------------------------|----------------------------------------------------------------------------------------------------------------------------------------------------------|-----------------------|-------------------------------------------------|--------------------------------------------------------------|-------------------------------------------------------------------------------------------------------------------|-------------------------------------------------------------|---------------------------------------------------------------------------------------------------------------------------------------------------------------------------------------------------------------------------|------------------------------------------------------------------------------------------------------------------------------------------------------------------------------------------------------------------------------------|---------------------------------------------------------------------------------------------------------------------------------------------------------------------------------------------------------|-------------------------------------------------------------------------------------------------------------------------------------------------------------------------------------------------------------------------------|---------------------------------------------------------------------------------------------------------------------------------------------------|
|                              |              |                                                                                                                                                  |                                                                                                                                                          |                       |                                                 |                                                              |                                                                                                                   | (IQR)=22.6<br>(5.0)                                         | of treatment:<br>mean =1.2 years                                                                                                                                                                                          |                                                                                                                                                                                                                                    | mean<br>(SD)=14.7(2.4)<br>years, median<br>(IQR)= 15.0 (5.0)<br>years                                                                                                                                   | lymphoblastic leu-<br>kaemia:17.4%,<br>Ewing's sarcoma:<br>8.7%, osteosarcoma:<br>8.7%, germ cell tu-<br>mour: 8.7%, acute<br>myelocytic leukae-<br>mia: 4.3%, chondro-<br>sarcoma: 4.3%, non-<br>Hodgkin lym-<br>phoma: 4.3% | the cancer<br>survivors,<br>being of the<br>same gender<br>and within 2<br>years of the<br>survivor's<br>age (n = 14)                             |
| Parsons 2012<br>et al. [17]  | USA          | Cohort study                                                                                                                                     | AYA Hope<br>Study, obser-<br>vational co-<br>hort study                                                                                                  | self-report<br>survey | n = 463 (all<br>AYA can-<br>cer survi-<br>vors) | Initial sur-<br>vey: 43.4%,<br>follow-up<br>survey:<br>88.7% | AYA cancer<br>survivors<br>working or<br>in school<br>full-time be-<br>fore diagno-<br>sis (n = 388);<br>64% male | not reported                                                | AYA cancer sur-<br>vivors working<br>or in school full-<br>time before diag-<br>nosis (n = 388);<br>15-19 years:<br>13.1%, 20-24<br>years: 17.8%, 25-<br>29 years: 24.7%,<br>30-34 years:<br>23.2%, 35-39<br>years: 21.1% | AYA cancer<br>survivors<br>working or in<br>school full-<br>time before di-<br>agnosis (n =<br>388); 15-19<br>months:<br>13.1%, 20-24<br>months:<br>42.5%, 25-29<br>months: 34%,<br>30-35 months:<br>10.1%, range:<br>25-35 months | <b>Employment (d):</b><br>unemployed: 4.3%,<br>homemaker: 3.0%,<br>part-time: 8.9%,<br>full-time: 83.8%                                                                                                 | germ cell: 40.5%,<br>Hodgkin's lym-<br>phoma: 26%, non-<br>Hodgkin's lym-<br>phoma: 24.2%, sar-<br>coma: 4.6%, acute<br>lymphoblastic leu-<br>kaemia: 3.9%                                                                    | AYA cancer<br>survivors 15-<br>24 months<br>after diagno-<br>sis and<br>working or<br>in school<br>full-time be-<br>fore diagno-<br>sis (n = 216) |
| Strauser 2010<br>et al. [41] | USA          | Longitudinal<br>study (re-<br>stricted to<br>AYACS who<br>were unem-<br>ployed at<br>time of appli-<br>cation for vo-<br>cational ser-<br>vices) | U.S. Depart-<br>ment of Edu-<br>cation, Reha-<br>bilitation Ser-<br>vice Admin-<br>istration<br>(RSA) Case<br>Service Re-<br>port (Form<br>911) database | not reported          | n = 368                                         | not reported                                                 | 57% male                                                                                                          | mean<br>(SD)=21.46<br>(2.39) year,<br>range: 18-25<br>years | not reported                                                                                                                                                                                                              | >2 years                                                                                                                                                                                                                           | <b>Education (s):</b><br>special education:<br>6%, less than high<br>school: 33.4%,<br>completed high<br>school: 42.7%,<br>post-secondary/as-<br>sociate: 16.6%, col-<br>lege degree or<br>higher: 1.4% | not reported                                                                                                                                                                                                                  | none                                                                                                                                              |
| Sylvest 2022<br>et al. [42]  | Den-<br>mark | Register-<br>based cohort<br>study                                                                                                               | Danish Can-<br>cer Register,<br>several Dan-<br>ish popula-<br>tion registers                                                                            | not reported          | n = 4222                                        | not applica-<br>ble                                          | 100% male                                                                                                         | ≥35 years                                                   | range: 0-29 years,                                                                                                                                                                                                        | CNS cancer:<br>mean<br>(SD)=14.59<br>(9.30) years,                                                                                                                                                                                 | For age group 20-<br>29 years at diagno-<br>sis<br><b>Education (s):</b>                                                                                                                                | CNS tumours: 5.0%,<br>haematological<br>tumours: 6.5%, solid<br>tumours: 88.5%                                                                                                                                                | age-matched<br>comparison<br>group of the                                                                                                         |

|                         |     |                       |                                                                                                            |                                |         |        |            |                                                |                                        |                                                                                                 |                                                                                                                                                                                                                                                                                                                       |                                                                                                                                               |                                                                                                         |
|-------------------------|-----|-----------------------|------------------------------------------------------------------------------------------------------------|--------------------------------|---------|--------|------------|------------------------------------------------|----------------------------------------|-------------------------------------------------------------------------------------------------|-----------------------------------------------------------------------------------------------------------------------------------------------------------------------------------------------------------------------------------------------------------------------------------------------------------------------|-----------------------------------------------------------------------------------------------------------------------------------------------|---------------------------------------------------------------------------------------------------------|
|                         |     |                       |                                                                                                            |                                |         |        |            |                                                |                                        | haematological cancer: mean (SD)=16.68 (10.67) years, solid cancer: mean (SD)=9.37 (8.47) years | primary school: 19%, high school: 6%, vocational training: 40%, short further education: 6%, medium length further education: 15%, long further education: 15%<br><b>Employment (s):</b> employed: 84%, unemployed but in the workforce: 3%, outside the workforce (retired/receiving transfer income): 8%, other: 4% |                                                                                                                                               | general population (n = 794589)                                                                         |
| Tangka 2020 et al. [43] | USA | Cross-sectional study | state cancer registries in California, Florida, Georgia, and North Carolina + data collected for the study | paper and online questionnaire | n = 830 | 28.40% | all female | not reported                                   | 18-34 years: 39.5%, 35-39 years: 60.5% | not reported                                                                                    | <b>Education (s):</b> graduate degree: 23.1%, bachelor's degree: 34.3%, some college: 27.2%, high school or less: 13.6%, missing: 1.9%<br><b>Employment (d):</b> employed: 73.4%                                                                                                                                      | all breast cancer                                                                                                                             | none                                                                                                    |
| Tebbi 1989 et al. [44]  | USA | Cross-sectional study | collected data                                                                                             | survey                         | n = 40  | 30%    | 40% male   | mean (SD)=26.4 (4.2) years, range: 18-35 years | mean = 16.15 years, range: 13-19 years | mean (SD)=10.1(3.2) years                                                                       | survivors vs comparisons:<br><b>Employment status (s):</b> unemployed: 27.5% vs 17.5%, part-time employed: 10.0% vs 17.5%, full-time employed: 12.5% vs 17.5%                                                                                                                                                         | Hodgkin's/non-Hodgkin's lymphoma: 47.5%, soft tissue sarcoma/melanomas: 20.0%, leukaemia: 7.5%, bone tumours: 20.0%, ovarian/testicular: 5.0% | 15 male and 25 female controls without a cancer history and with age range from 18 to 35 years (n = 40) |

|                         |     |                       |                              |                      |         |        |            |                             |                             |                                                          |                                                                                                                                                                                                                                                                                                                                                                                                                                                                                                                                                                                                                     |                                                                                                                                                                               |                                                            |
|-------------------------|-----|-----------------------|------------------------------|----------------------|---------|--------|------------|-----------------------------|-----------------------------|----------------------------------------------------------|---------------------------------------------------------------------------------------------------------------------------------------------------------------------------------------------------------------------------------------------------------------------------------------------------------------------------------------------------------------------------------------------------------------------------------------------------------------------------------------------------------------------------------------------------------------------------------------------------------------------|-------------------------------------------------------------------------------------------------------------------------------------------------------------------------------|------------------------------------------------------------|
| Thom 2021 et al. [45]   | USA | Cross-sectional study | collected data for the study | online questionnaire | n = 212 | 65%    | 8.9% male  | mean (SD)=35.3 (5.25) years | mean (SD)=27.4 (7.17) years | mean (SD) time since treatment=6.2 (5.89) years          | <b>Highest education (s):</b><br>high school: 3.8%, some college or vocational training: 11.3%, associate's degree: 8.0%, bachelor's degree: 32.5%, graduate or professional degree: 42.0%, prefer not to respond: 2.4%<br><b>Employment status (s):</b><br>working full-time: 58.0%, working part-time: 8.5%, homemaker/stay-at-home parent: 7.1%, in school: 9.0%, on disability: 17.5%, unemployed: 7.5%, prefer not to respond: 5.8%<br><b>Household income (s):</b><br><\$25,000: 13.7%, \$25,000-\$49,999: 17.5%, \$50,000-\$99,999: 35.4%, ≥\$100,000: 25.9%, do not know: 2.4%, prefer not to respond: 5.2% | breast: 27.8%, lymphoma: 16.5%, colorectal: 11.3%, leukaemia: 9.4%, brain: 7.1%, gynaecological: 6.1%, sarcoma: 6.1%, thyroid: 4.7%, other: 8.0%, prefer not to respond: 0.5% | none                                                       |
| Yanez, 2013 et al. [46] | USA | Cross-sectional study | Collected data               | online survey        | n = 106 | 66.50% | 31.6% male | mean (SD)=32.2 (5.1) years  | not reported                | range: 25-60 months, 3 years after treatment completion: | short-time vs intermediate vs long-term survivors:<br><b>Educational attainment (s):</b>                                                                                                                                                                                                                                                                                                                                                                                                                                                                                                                            | breast: 24.8%, cervical: 11.5%, melanoma: 9.7%, lung: 8.0%, colorectal:                                                                                                       | AYA cancer survivors 0-24 months after diagnosis (n = 216) |

|                                                                                                         |                                                                                                                                                                                                                                                                                                                                               |                                          |
|---------------------------------------------------------------------------------------------------------|-----------------------------------------------------------------------------------------------------------------------------------------------------------------------------------------------------------------------------------------------------------------------------------------------------------------------------------------------|------------------------------------------|
| 41%, 4 years<br>after treatment<br>completion:<br>31%, 5 years<br>after treatment<br>completion:<br>28% | less than college<br>degree: 39.2% vs<br>34.3% vs 41.6%<br><b>Household in-<br/>come (s):</b><br>≤74,999\$: 56.7% vs<br>38.2% vs 55.8%<br><b>Employment sta-<br/>tus (s):</b><br>employed: 64.2%<br>vs 77.5% vs 69%,<br>homemaker: 9.2%<br>vs 9.8% vs 11.5%,<br>unemployed:<br>15.8% vs 3.8% vs<br>10.7%, student:<br>9.2% vs 7.8% vs<br>6.2% | 3.5%, thyroid: 9.7%,<br>testicular: 4.4% |
|---------------------------------------------------------------------------------------------------------|-----------------------------------------------------------------------------------------------------------------------------------------------------------------------------------------------------------------------------------------------------------------------------------------------------------------------------------------------|------------------------------------------|

---

Abbreviations: d, diagnosis; s, study; t, treatment; fu, follow-up; CI, confidence interval; IQR, interquartile range; SD, standard deviation; NHIS, National Health Interview Surveys; MEPS, Medical Expenditure Panel Survey; CNS, central nervous system; RM, Malaysian ringgit; PhD, doctoral degree

**Table S2:** Characteristics of included qualitative studies (detailed version).

| First author, publication year | Country     | Study design or approach, analysis method               | Data collection method                                                                                                                       | Sample size | Gender: percentage male | Age at time of study                                     | Age at diagnosis                                            | Time since diagnosis                                                                                  | Cancer types                                                                                                                           | Education, employment, and/or finances (not main outcomes, additionally reported)                                                                                                                                                                                                                                                        |
|--------------------------------|-------------|---------------------------------------------------------|----------------------------------------------------------------------------------------------------------------------------------------------|-------------|-------------------------|----------------------------------------------------------|-------------------------------------------------------------|-------------------------------------------------------------------------------------------------------|----------------------------------------------------------------------------------------------------------------------------------------|------------------------------------------------------------------------------------------------------------------------------------------------------------------------------------------------------------------------------------------------------------------------------------------------------------------------------------------|
| An 2019 et al. [47]            | South Korea | Grounded theory/thematic analysis                       | in-depth interviews                                                                                                                          | n = 14      | 21.43% male             | range: 14-22 years                                       | not reported                                                | not reported; adolescents who visited a hospital for follow-up care following treatment for leukaemia | acute lymphoid leukaemia: 42.9%, acute myeloid leukaemia: 50%, chronic myeloid leukaemia: 7.1%                                         | not reported                                                                                                                                                                                                                                                                                                                             |
| Brauer 2017 et al. [48]        | USA         | Grounded theory; systematic yet flexible coding process | in-depth interviews                                                                                                                          | n = 18      | 61.1% male              | mean = 26 years, range: 19.8-34.6 years                  | age at treatment: mean = 23.3 years, range: 18.5-29.7 years | time since treatment: mean = 32.8 months, range: 8-60 months                                          | acute myeloid leukaemia: 56%, acute lymphoblastic leukaemia: 28%, Hodgkin's lymphoma: 11%, non-Hodgkin's lymphoma: 5%                  | <b>Educational attainment (s):</b><br>some high school: 6%, high school degree: 11%, some college degree: 50%, 4-year college degree: 28%, graduate degree: 6%<br><b>School/employment status (s):</b><br>no school and unemployed: 33%, full-time or part-time student: 28%, full- or part-time employed: 33%, student and employed: 6% |
| Drake 2019 et al. [49]         | Canada      | Phenomenology; thematic analysis                        | in-depth interviews                                                                                                                          | n = 5       | 40% male                | mean (SD)=32 (6.78) years, range: 25-40 years            | range: 18-39 years                                          | not reported                                                                                          | 5 participants with Hodgkin's lymphoma, multiple myeloma, malignant neoplasm of the pineal region, thyroid cancer, and appendix cancer | not reported                                                                                                                                                                                                                                                                                                                             |
| Elsbernd 2018 et al. [50]      | Denmark     | Thematic analysis                                       | semi-structured interviews                                                                                                                   | n = 9       | 22.2% male              | mean = 24.2 years, median = 25 years, range: 19-27 years | range: 17-24 years                                          | time since last treatment: range: <1 - >10 years                                                      | 9 participants with lymphoma (2), breast (2), leukaemia, cervical, testicular, pancreatic, and brain tumour                            | <b>Educational attainment and sick-leave (s):</b><br>attending secondary or higher education: 88.9%, sick leave: 11.1%                                                                                                                                                                                                                   |
| Ghazal 2021 et al. [51]        | USA         | Thematic analysis combined with an abductive approach   | semi-structured interview data from two interview studies: a study of health-related quality of life in testicular cancer and a study of the | n = 52      | 59.6% male              | mean (SD)=25.29 (2.88) years, range: 18-29 years         | not reported                                                | mean (SD)=31.25 (17.12) months                                                                        | hematologic: 61.5%, testicular: 38.5%                                                                                                  | <b>Educational attainment (s):</b><br>college graduated: 51.9%                                                                                                                                                                                                                                                                           |

|                                |        |                                                                                                                         |                                                        |        |            |                                                                                                                                          |                                                                                                                        |                                     |                                                                                                                                                                                                                                                                                       |                                                                                                                                                                                                          |
|--------------------------------|--------|-------------------------------------------------------------------------------------------------------------------------|--------------------------------------------------------|--------|------------|------------------------------------------------------------------------------------------------------------------------------------------|------------------------------------------------------------------------------------------------------------------------|-------------------------------------|---------------------------------------------------------------------------------------------------------------------------------------------------------------------------------------------------------------------------------------------------------------------------------------|----------------------------------------------------------------------------------------------------------------------------------------------------------------------------------------------------------|
|                                |        |                                                                                                                         |                                                        |        |            |                                                                                                                                          |                                                                                                                        |                                     |                                                                                                                                                                                                                                                                                       | psychosocial adaptation among young adults with hematologic cancer                                                                                                                                       |
| Kent 2012 et al. [53]          | USA    | Hermeneutic phenomenology (interpretative method); grounded theory; narrative analysis                                  | focus group methodology and semi-structured interviews | n = 19 | 52.6% male | 15-19 years: 5.3%, 20-23 years: 10.5%, 24-26 years: 15.8%, 27-29 years: 15.8%, 30-33 years: 26.3%, 34-36 years: 21.1%, 37-39 years: 5.3% | 15-19 years: 15.8%, 20-23 years: 21.1%, 24-26 years: 21.1%, 27-29 years: 21.1%, 30-33 years: 10.5%, 34-36 years: 10.5% | range: 6 months-6 years             | non-Hodgkin's lymphoma: 21.1%, Hodgkin's: 10.5%, brain tumour: 10.5%, acute lymphoblastic leukaemia: 10.5%, ovarian: 10.5%, melanoma: 5.3%, Wilm's tumour: 5.3%, testicular: 5.3%, ovarian: 5.3%, acute lymphoblastic leukaemia: 5.3%, multiple myeloma: 5.3%, aplastic anaemia: 5.3% | not reported                                                                                                                                                                                             |
| Parsons, 2008 et al. [55]      | Canada | Postmodern narrative approach; data analysis occurred in conjunction with data collection                               | in-depth interviews                                    | n = 14 | 57.1% male | mean = 27.4 years, median = 26.5 years, range: 18-38 years                                                                               | mean = 24.2 years, median = 23 years, range: 16-35 years,                                                              | range: 1-6 years                    | all osteosarcoma                                                                                                                                                                                                                                                                      | not reported                                                                                                                                                                                             |
| Raque-Bogdan, 2015 et al. [56] | USA    | Consensual method                                                                                                       | semi-structured interviews                             | n = 13 | all female | range: 24-43 years                                                                                                                       | mean (SD)=30 (5) years, median = 27 years, range: 21-38 years                                                          | mean = 3.54 years                   | all breast                                                                                                                                                                                                                                                                            | restricted to women working full-time at time of diagnosis:<br><b>Educational attainment (s):</b><br>college: 46%, graduate school: 54%<br><b>Annual income (s):</b><br><\$100,000: 46%, ≥\$100,000: 54% |
| Stone 2019 et al. [57]         | USA    | Constructivist grounded theory; analytic techniques including initial, focused, axial and theoretical coding procedures | semi-structured interviews                             | n = 12 | 25% male   | mean = 43.9 years, range: 28-59 years                                                                                                    | mean = 29 years, 18-29 years: 50% 30-39 years: 50%                                                                     | mean =14.8 years, range: 8-35 years | breast: 33%, leukaemia or lymphoma: 33%, melanoma: 8%, testicular: 17%, thyroid: 8%                                                                                                                                                                                                   | not reported                                                                                                                                                                                             |
| Ghazal 2021 et al. [51]        | USA    | Cross-sectional study                                                                                                   | semi-structured interviews + questionnaire             | n = 40 | 36.5% male | not reported                                                                                                                             | median (SD)=28 (5.26) years, range: 20-38 years                                                                        | range: 1-5 years                    | lymphoma: 82.5%, leukaemia: 17.5%                                                                                                                                                                                                                                                     | <b>Employment (s):</b><br>employed: 92.5%, not employed: 2.5%, in education: 5.0%<br><b>Level of education (s):</b>                                                                                      |

|                          |                |                                                               |                                                           |       |          |                                                          |                                                            |              |                                                                                                                                                  |                                                                            |
|--------------------------|----------------|---------------------------------------------------------------|-----------------------------------------------------------|-------|----------|----------------------------------------------------------|------------------------------------------------------------|--------------|--------------------------------------------------------------------------------------------------------------------------------------------------|----------------------------------------------------------------------------|
|                          |                |                                                               | survey for socio-demographic and clinical characteristics |       |          |                                                          |                                                            |              | high school: 7.5%, college: 22.5%, associate's degree: 10%, bachelor's degree: 25%, master's degree: 22.5%, professional or doctoral degree: 10% |                                                                            |
| Magrath 2021 et al. [54] | United Kingdom | Phenomenological analysis, analysis was performed iteratively | semi-structured interviews                                | n = 8 | 50% male | mean = 21.8 years, median = 21 years, range: 18-27 years | mean = 17.6 years, median = 17.5 years, range: 16-19 years | not reported | brain tumour: 12.5%, lymphoma: 75%, leukaemia: 12.5%                                                                                             | <b>Education (d):</b><br>sixth form education: 100%, higher education: 75% |

Abbreviations: d, diagnosis; s, study; t, treatment

**Table S3:** PICO formats for the research questions.

|                                                                                                                                             |                                                                                   |
|---------------------------------------------------------------------------------------------------------------------------------------------|-----------------------------------------------------------------------------------|
| <b>Research question i): To describe education, employment, and financial outcomes in AYA cancer survivors:</b>                             |                                                                                   |
| For articles including a comparison group:                                                                                                  |                                                                                   |
| <b>Population</b>                                                                                                                           | Adults                                                                            |
| <b>Intervention/Exposure</b>                                                                                                                | Survivors of cancer during adolescence or young adulthood (15 to 39 years of age) |
| <b>Comparison</b>                                                                                                                           | Comparison group                                                                  |
| <b>Outcome</b>                                                                                                                              | Education, employment, and/or financial outcomes                                  |
| For articles not including a comparison group:                                                                                              |                                                                                   |
| <b>Population</b>                                                                                                                           | Survivors of cancer during adolescence or young adulthood (15 to 39 years of age) |
| <b>Intervention/Exposure</b>                                                                                                                | -                                                                                 |
| <b>Comparison</b>                                                                                                                           | -                                                                                 |
| <b>Outcome</b>                                                                                                                              | Education, employment, and/or financial outcomes                                  |
| <b>Research question ii): To describe determinants for adverse educational, employment, and financial outcomes in AYA cancer survivors:</b> |                                                                                   |
| <b>Population</b>                                                                                                                           | Survivors of cancer during adolescence or young adulthood (15 to 39 years of age) |
| <b>Intervention/Exposure</b>                                                                                                                | Different levels of various characteristics                                       |
| <b>Comparison</b>                                                                                                                           | Different levels of various characteristics                                       |
| <b>Outcome</b>                                                                                                                              | Education, employment, and/or financial outcomes                                  |



**Table S4:** Search blocks for the search in the literature databases.

|                                            |                                                                                                                                                                                                                                                                                                                                                                                                                                                                                                                                                                                                                                                                                    |
|--------------------------------------------|------------------------------------------------------------------------------------------------------------------------------------------------------------------------------------------------------------------------------------------------------------------------------------------------------------------------------------------------------------------------------------------------------------------------------------------------------------------------------------------------------------------------------------------------------------------------------------------------------------------------------------------------------------------------------------|
| <b>Block 1:</b>                            | (employment [MeSH terms] OR absenteeism [MeSH Terms] OR sick leave [MeSH Terms] OR rehabilitation, vocational [MeSH Terms] OR vocational guidance [MeSH Terms] OR occupation[MeSH Terms] OR occupation* OR return to work[mh] OR employment OR unemploy* OR vocational OR vocation* OR career OR income OR benefits use[tiab] OR socioeconomic status[tiab] OR insurance, disability[mh] OR disability insurance[tiab] OR salaries and fringe benefits[mh] OR salaries and fringe benefits OR social security OR financial burden OR financial toxicity OR economic burden OR financial hardship) OR (educational status[mh] OR education[mh] OR education* OR level of education) |
| <b>Block 2:</b>                            |                                                                                                                                                                                                                                                                                                                                                                                                                                                                                                                                                                                                                                                                                    |
| <b>Adolescents and young adults (AYAs)</b> | ("young adult" OR "young person*" OR "young people" OR AYA OR TYA OR adolescen* OR teen* OR youngster* OR pre-teen)                                                                                                                                                                                                                                                                                                                                                                                                                                                                                                                                                                |
| <b>Block 3:</b>                            |                                                                                                                                                                                                                                                                                                                                                                                                                                                                                                                                                                                                                                                                                    |
| <b>Cancer</b>                              | (neoplasm* OR cancer* OR carcinoma* OR tumor* OR tumour* OR malignan* OR leukemia* OR leukaemia* OR sarcoma* OR radiotherapy OR chemotherapy)                                                                                                                                                                                                                                                                                                                                                                                                                                                                                                                                      |
| <b>Block 4:</b>                            |                                                                                                                                                                                                                                                                                                                                                                                                                                                                                                                                                                                                                                                                                    |
| <b>Survivorship</b>                        | (Survivor OR survivors OR Long-Term Survivors OR Long Term Survivors OR Long-Term Survivor OR Survivor, Long-Term OR Survivors, Long-Term OR survivo* OR survivi*)                                                                                                                                                                                                                                                                                                                                                                                                                                                                                                                 |
| <b>Search</b>                              | Block 1 AND Block 2 AND Block 3 AND Block 4                                                                                                                                                                                                                                                                                                                                                                                                                                                                                                                                                                                                                                        |

**Table S5:** Quality assessment for quantitative cross-sectional studies.

---

|                                                                             |
|-----------------------------------------------------------------------------|
| 1. Were the criteria for inclusion in the sample clearly defined?           |
| 2. Were the study subjects and the setting described in detail?             |
| 3. Was the exposure measured in a valid and reliable way?                   |
| 4. Were objective, standard criteria used for measurement of the condition? |
| 5. Were confounding factors identified?                                     |
| 6. Were strategies to deal with confounding factors stated?                 |
| 7. Were the outcomes measured in a valid and reliable way?                  |
| 8. Was appropriate statistical analysis used?                               |

---

**Table S6:** Quality assessment for qualitative studies.

- 
1. Is there congruity between the stated philosophical perspective and the research methodology?
  2. Is there congruity between the research methodology and the research question or objectives?
  3. Is there congruity between the research methodology and the methods used to collect data?
  4. Is there congruity between the research methodology and the representation and analysis of data?
  5. Is there congruity between the research methodology and the interpretation of results?
  6. Is there a statement locating the researcher culturally or theoretically?
  7. Is the influence of the researcher on the research, and vice-versa, addressed?
  8. Are participants, and their voices, adequately represented?
  9. Is the research ethical according to current criteria or, for recent studies, and is there evidence of ethical approval by an appropriate body?
  10. Do the conclusions drawn in the research report flow from the analysis, or interpretation, of the data?
-
